# Supplementary material
Source: Springer Nature journal article supplement (https://www.springermedizin.de/resource/supplementary/13014_2013_894_MOESM3_ESM.pdf/9634382)

CTV

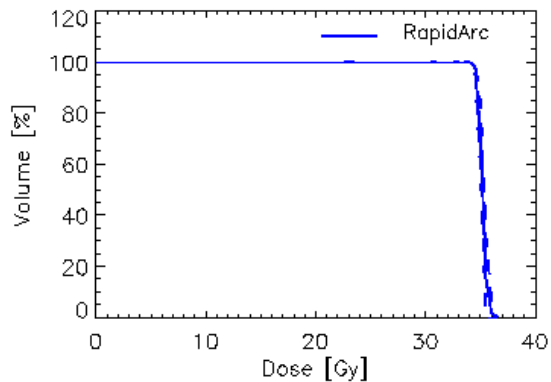

PTV

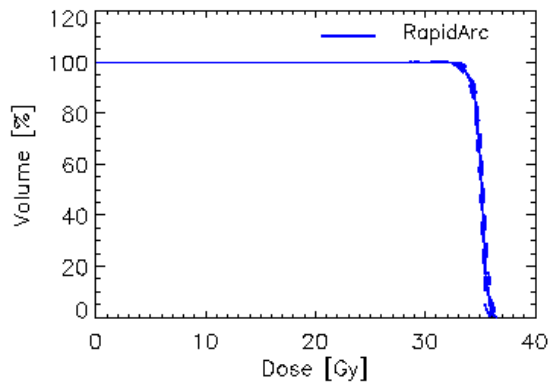

Rectum

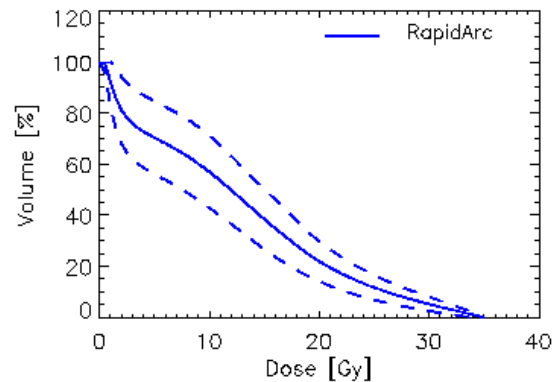

Bladder

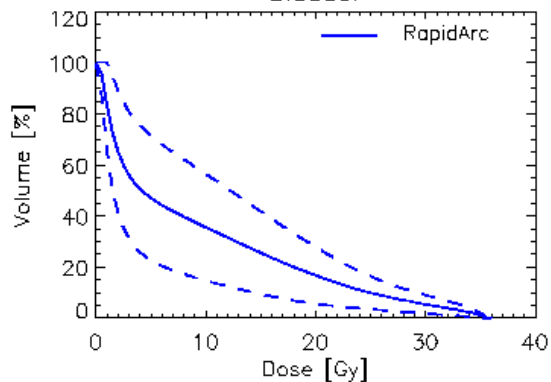

Penile bulb

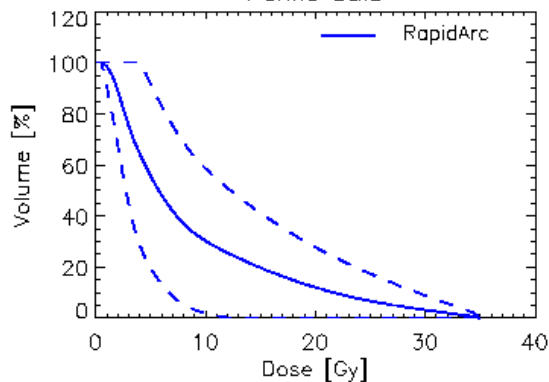

Right femoral head

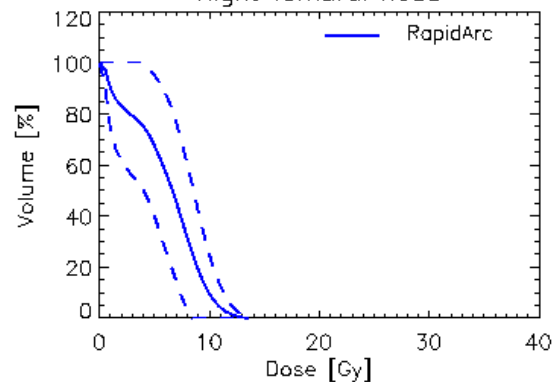

Left femoral head

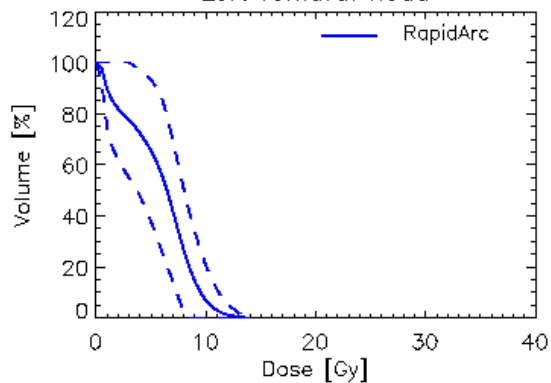

Healthy tissue

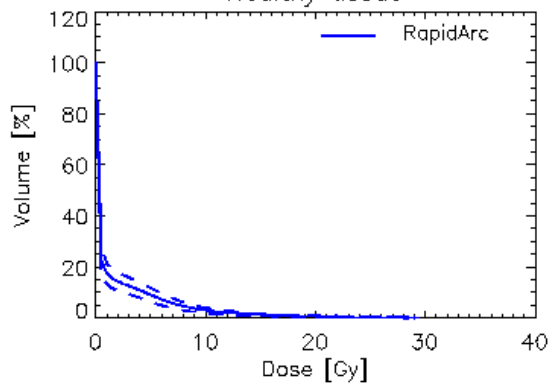

Supplement: MOESM3 [file 9634382]
